# Supplementary material for: Acyl protein thioesterase 1 and 2 (APT-1, APT-2) inhibitors palmostatin B, ML348 and ML349 have different effects on NRAS mutant melanoma cells
Source: PubMed Central journal article supplement (PMC4872786; doi:10.18632/oncotarget.6907), 2016-01-13
Supplement: oncotarget-07-7297-s001.pdf [file oncotarget-07-7297-s001.pdf]

**SUPPLEMENTARY TABLE****Supplementary Table S1: Growth inhibitory effects of palmostatin B in melanoma cell lines.**

| Melanoma Cell Line | Mutation   | GI50 value [ $\mu$ M] |
|--------------------|------------|-----------------------|
| DO4                | NRAS Q61L  | 77.53                 |
| MM415              | NRAS Q61L  | 72.51                 |
| MM485              | NRAS Q61R  | >100                  |
| SK-MEL-2           | NRAS Q61K  | 79.15                 |
| WM1366             | NRAS Q61L  | 50.82                 |
| WM3060             | NRAS Q61K  | 49.43                 |
| WM3629             | NRAS G12D  | 27.98                 |
| WM3670             | NRAS G12D  | 9.93                  |
| SK-MEL-28          | BRAF V600E | >100                  |

The table displays concentrations of drugs resulting in 50% decrease of cell viability relative to DMSO treated controls (GI50). Drug concentrations tested ranged from 1.5 to 100  $\mu$ M.
